# Supplementary material for: Impacts of climate change on water resources in the major countries along the Belt and Road
Source: PeerJ. 2021 Oct 12;9:e12201. doi: 10.7717/peerj.12201 (PMC8519177; doi:10.7717/peerj.12201)
Supplement: Supplemental Information 1 [file peerj-09-12201-s001.xlsx]

## Sheet: Table S1
Data	Provider/Sources	Website
The B&R countries	Belt and Road Portal	https://eng.yidaiyilu.gov.cn/
Total runoff	CMIP5	https://esgf-node.llnl.gov/search/cmip5/
Water demands	FAO AQUASTAT	http://www.fao.org/aquastat/en/
Climate variables	WorldClim	https://www.worldclim.org/
Population and GDP	Murakami and Yamagata (2019)	http://www.cger.nies.go.jp/gcp/population-and-gdp.html
Land-use data	RCP Database	https://tntcat.iiasa.ac.at/RcpDb/dsd?Action=htmlpage&page=download
