# Supplementary material for: Impacts of climate change on water resources in the major countries along the Belt and Road
Source: PeerJ. 2021 Oct 12;9:e12201. doi: 10.7717/peerj.12201 (PMC8519177; doi:10.7717/peerj.12201)
Supplement: Supplemental Information 2 [file peerj-09-12201-s002.xlsx]

## Sheet: Sheet1
Country	Water resources (km3/yr)				Relative change (%)
	baseline	RCP2.6	RCP4.5	RCP8.5	RCP2.6	RCP4.5	RCP8.5
Afghanistan	47.15	44.53	39.38	38.68	-5.55673	-16.4793	-17.9639
Albania	26.9	27.67	27.41	26.1	2.86245	1.89591	-2.97398
Algeria	11.25	12.88	11.15	11.76	14.4889	-0.888889	4.53333
Angola	148	149.48	140.36	144.61	1	-5.16216	-2.29054
Armenia	6.86	5.65	5.27	4.81	-17.6385	-23.1778	-29.8834
Austria	55	60.8	60.47	59.56	10.5455	9.94545	8.29091
Azerbaijan	8.11	7.97	7.59	7.23	-1.72626	-6.41184	-10.8508
Bangladesh	105	98.3	97.72	107.66	-6.38095	-6.93333	2.53333
Belarus	34	33.67	34.73	34.58	-0.970588	2.14706	1.70588
Benin	10.3	10.94	10.59	11.1	6.21359	2.81553	7.76699
Bhutan	86	121.42	118.97	129.8	41.186	38.3372	50.9302
Bolivia	303.5	285.3	284.94	288.34	-5.99671	-6.11532	-4.99506
Bulgaria	21	20.66	19.26	18.88	-1.61905	-8.28571	-10.0952
Burundi	10.06	9.98	10.08	10.77	-0.795229	0.198807	7.05765
Cambodia	120.6	129.63	131.59	138.07	7.48756	9.11277	14.4859
Cameroon	273	281.26	270.52	286.68	3.02564	-0.908425	5.01099
Chad	15	16.1	14.5	16.2	7.33333	-3.33333	8
Chile	885	894.89	888.22	866.79	1.11751	0.363842	-2.05763
China	2813	2891.11	2904.77	2925.51	2.77675	3.26235	3.99964
Costa Rica	113	137.17	135.07	134.45	21.3894	19.531	18.9823
Croatia	37.7	36.93	35.77	33.47	-2.04244	-5.11936	-11.2202
Cuba	38.12	38.98	41.8	37.75	2.25603	9.65373	-0.970619
Cyprus	0.78	0.82	0.74	0.69	5.12821	-5.12821	-11.5385
Czech Republic	13.15	13.47	13.52	13.52	2.43346	2.81369	2.81369
Djibouti	0.3	0.31	0.31	0.38	3.33333	3.33333	26.6667
Dominican Republic	23.5	24.44	23.96	23.28	4	1.95745	-0.93617
East Timor	8.21	7.74	8.34	8.29	-5.72473	1.58343	0.974421
Ecuador	442.4	434.12	424.98	443.34	-1.87161	-3.93761	0.212477
Egypt	1	1.01	1.02	1.01	1	2	1
El Salvador	15.63	19.07	18.68	18.97	22.009	19.5138	21.3692
Equatorial Guinea	26	26.47	25.79	27.28	1.80769	-0.807692	4.92308
Estonia	12.71	12.57	12.77	13.51	-1.10149	0.472069	6.29426
Ethiopia	122	140.26	135.21	139.75	14.9672	10.8279	14.5492
Fiji	28.55	29.59	29.12	29.37	3.64273	1.9965	2.87215
Gabon	164	156.27	157.68	164.05	-4.71341	-3.85366	0.0304878
Georgia	58.13	57.92	56.75	55.52	-0.361259	-2.37399	-4.48994
Ghana	30.3	33.37	31.93	33.33	10.132	5.37954	10
Greece	58	57.64	54.36	49.99	-0.62069	-6.27586	-13.8103
Guinea	226	238.59	236.52	249.69	5.5708	4.65487	10.4823
Guyana	241	255.68	255.63	266.35	6.09129	6.07054	10.5187
Hungary	6	5.48	5.49	5.04	-8.66667	-8.5	-16
Indonesia	2019	2164.63	2253.35	2352.85	7.21298	11.6072	16.5354
Iran	128.5	121.09	111.42	105.12	-5.76654	-13.2918	-18.1946
Iraq	35.2	27.68	25.29	23.44	-21.3636	-28.1534	-33.4091
Israel	0.75	0.74	0.71	0.71	-1.33333	-5.33333	-5.33333
Italy	182.5	182	177.41	168	-0.273973	-2.78904	-7.94521
Ivory Coast	76.84	82.22	79.05	82.39	7.00156	2.87611	7.2228
Jamaica	10.82	11.61	11.54	11.52	7.30129	6.65434	6.4695
Jordan	0.68	0.59	0.59	0.6	-13.2353	-13.2353	-11.7647
Kazakhstan	64.35	59.33	58.77	54.6	-7.80109	-8.67133	-15.1515
Kenya	20.7	22.87	24.25	24.55	10.4831	17.1498	18.599
Kyrgyzstan	48.93	51.22	49.98	47.65	4.68016	2.14592	-2.61598
Laos	190.4	191.51	197.71	206.85	0.582983	3.83929	8.63971
Latvia	16.94	17	17.17	17.98	0.354191	1.35773	6.13932
Lebanon	4.8	5.08	4.86	4.76	5.83333	1.25	-0.833333
Lesotho	5.23	4.78	4.66	4.55	-8.60421	-10.8987	-13.0019
Liberia	200	215.9	214.02	217.21	7.95	7.01	8.605
Libya	0.7	0.76	0.69	0.73	8.57143	-1.42857	4.28571
Lithuania	15.46	15.29	15.44	16.01	-1.09961	-0.129366	3.55757
Luxembourg	1	1.01	1.01	0.98	1	1	-2
Madagascar	337	349.57	345.25	349.01	3.72997	2.44807	3.5638
Malaysia	580	628.83	634.75	665.74	8.41897	9.43966	14.7828
Mali	60	72.23	67.62	71.98	20.3833	12.7	19.9667
Mauritania	0.4	0.62	0.63	0.61	55	57.5	52.5
Moldova	1.62	1.54	1.42	1.44	-4.93827	-12.3457	-11.1111
Mongolia	34.8	36.91	36.52	37.6	6.06322	4.94253	8.04598
Montenegro	12.5	13.1	13.06	12.6	4.8	4.48	0.8
Morocco	29	32.34	32.4	30.54	11.5172	11.7241	5.31034
Mozambique	100.3	97.17	97.65	96.05	-3.12064	-2.64207	-4.23729
Myanmar	1003	1068.42	1063.67	1129.4	6.52243	6.04885	12.6022
Namibia	6.16	5.9	5.57	5.7	-4.22078	-9.57792	-7.46753
Nepal	198.2	230.64	223.13	227.35	16.3673	12.5782	14.7074
New Zealand	327	357.69	352.15	356.68	9.38532	7.69113	9.07645
Niger	3.5	4.48	4.02	4.39	28	14.8571	25.4286
Nigeria	221	241.76	219.44	241.82	9.39367	-0.705882	9.42081
Oman	1.4	1.48	1.39	1.4	5.71429	-0.714286	0
Pakistan	55	52.76	50.93	51.93	-4.07273	-7.4	-5.58182
Panama	136.6	148.58	139.61	149.04	8.77013	2.20351	9.10688
Papua New Guinea	801	905.82	915.06	979.75	13.0861	14.2397	22.3159
Peru	1641	1679.65	1671.74	1704.11	2.35527	1.87325	3.84583
Philippines	479	519.38	545.22	554.1	8.43006	13.8246	15.6785
Poland	53.6	50.59	52.84	52.16	-5.61567	-1.41791	-2.68657
Portugal	38	38.62	36.67	34.11	1.63158	-3.5	-10.2368
Qatar	0.06	0.05	0.04	0.04	-16.6667	-33.3333	-33.3333
Republic of Macedonia	5.4	5.59	5.43	5.06	3.51852	0.555556	-6.2963
Republic of the Congo	222	202.84	203.07	214.93	-8.63063	-8.52703	-3.18468
Romania	42.38	40.26	38.69	38.13	-5.00236	-8.70694	-10.0283
Russia	4312	4588.22	4676.95	4863.06	6.40584	8.46359	12.7797
Rwanda	9.5	9.41	9.3	10.06	-0.947368	-2.10526	5.89474
Saudi Arabia	2.4	2.46	2.6	2.88	2.5	8.33333	20
Senegal	25.8	31.38	31.63	33.02	21.6279	22.5969	27.9845
Serbia	8.41	7.85	7.53	7.23	-6.65874	-10.4637	-14.0309
Sierra Leone	160	172.66	173.51	180.87	7.9125	8.44375	13.0437
Slovakia	12.6	12.5	12.91	12.28	-0.793651	2.46032	-2.53968
Slovenia	18.67	19.35	19	18.35	3.64221	1.76754	-1.71398
Somalia	6	6.32	7.24	7.78	5.33333	20.6667	29.6667
South Africa	44.8	39.37	36.09	36.8	-12.1205	-19.442	-17.8571
South Korea	64.85	69.27	69.89	68.88	6.81573	7.77178	6.21434
South Sudan	26	27.68	26.86	29	6.46154	3.30769	11.5385
Sri Lanka	52.8	62.94	64.05	67.1	19.2045	21.3068	27.0833
Sudan	4	4.56	4.39	4.69	14	9.75	17.25
Suriname	99	116.88	114.07	125.65	18.0606	15.2222	26.9192
Syria	7.13	5.98	5.47	5	-16.129	-23.2819	-29.8738
Tajikistan	63.46	64.15	59.59	57.4	1.0873	-6.09833	-9.54932
Tanzania	84	86.17	86.5	91.1	2.58333	2.97619	8.45238
Thailand	224.5	222.22	223.98	235.18	-1.01559	-0.231626	4.75724
The Gambia	3	3.71	3.73	3.83	23.6667	24.3333	27.6667
Togo	11.5	12.29	11.91	12.43	6.86957	3.56522	8.08696
Trinidad and Tobago	3.84	3.52	3.78	3.68	-8.33333	-1.5625	-4.16667
Tunisia	4.19	4.15	3.79	3.79	-0.954654	-9.54654	-9.54654
Turkey	227	218.14	202.81	190.08	-3.90308	-10.6564	-16.2643
Turkmenistan	1.4	1.17	1.05	1.01	-16.4286	-25	-27.8571
Uganda	39	39.94	40.52	43.45	2.41026	3.89744	11.4103
Ukraine	55.1	50.23	50.98	49.83	-8.83848	-7.47731	-9.56443
United Arab Emirates	0.15	0.12	0.11	0.1	-20	-26.6667	-33.3333
Uruguay	92.2	117.96	125.14	150.43	27.9393	35.7267	63.1562
Uzbekistan	16.34	13.99	12.61	12.13	-14.3819	-22.8274	-25.765
Venezuela	805	827.24	820.32	800.03	2.76273	1.90311	-0.617391
Vietnam	359.4	388.58	402.33	424.44	8.11909	11.9449	18.0968
Yemen	2.1	2.67	2.96	3.14	27.1429	40.9524	49.5238
Zambia	80.2	75.2	75.27	74.94	-6.23441	-6.14713	-6.5586
Zimbabwe	12.26	12.48	13.14	12.35	1.79445	7.17781	0.734095
