# Supplementary material for: Impacts of climate change on water resources in the major countries along the Belt and Road
Source: PeerJ. 2021 Oct 12;9:e12201. doi: 10.7717/peerj.12201 (PMC8519177; doi:10.7717/peerj.12201)
Supplement: Supplemental Information 3 [file peerj-09-12201-s003.docx]

Supplemental Information for

Impacts of climate change on water resources in the major countries along the Belt and Road

**Panpan Du1,2,3, Ming Xu1,2, Renqiang Li1**

1 Key Laboratory of Ecosystem Network Observation and Modeling, Institute of Geographic Sciences and Natural Resources, the Chinese Academy of Sciences, Beijing, China

2 University of Chinese Academy of Sciences, Beijing, China

3 Sino-Danish Centre for Education and Research (SDC), Beijing, China

Corresponding Author:

Ming Xu1,2

Key Laboratory of Ecosystem Network Observation and Modeling, Institute of Geographic Sciences and Natural Resources, the Chinese Academy of Sciences, 11A Datun Road, Beijing, 100101, China

Email address: [mingxu@igsnrr.ac.cn](mailto:mingxu@igsnrr.ac.cn)

Renqiang Li1

Key Laboratory of Ecosystem Network Observation and Modeling, Institute of Geographic Sciences and Natural Resources, the Chinese Academy of Sciences, 11A Datun Road, Beijing, 100101, China

Email address: [renqiangli@igsnrr.ac.cn](mailto:renqiangli@igsnrr.ac.cn)

The Nash coefficient, used to evaluate the performance of the model, was calculated by the following formula:

Where is the ensembled runoff data from GCM at coarse spatial resolution around 2° (*Table 1*), is the mean value of total coarse runoff data and is the downscaled result by random forest model at the spatial resolution of 0.1°.
